# Supplementary material for: Xylan-Modified-Based Hydrogels with Temperature/pH Dual Sensitivity and Controllable Drug Delivery Behavior
Source: MDPI journal article supplement (doi:10.3390/ma10030304), 2017-03-16
Supplement: s1 [file s1]

# Supplementary Materials: Xylan-Modified based Hydrogels with Temperature/pH Dual Sensitivity and Controllable Drug Delivery Behavior

Wei-Qing Kong, Cun-Dian Gao, Shu-Feng Hu, Jun-Li Ren, Li-Hong Zhao and Run-Cang Sun

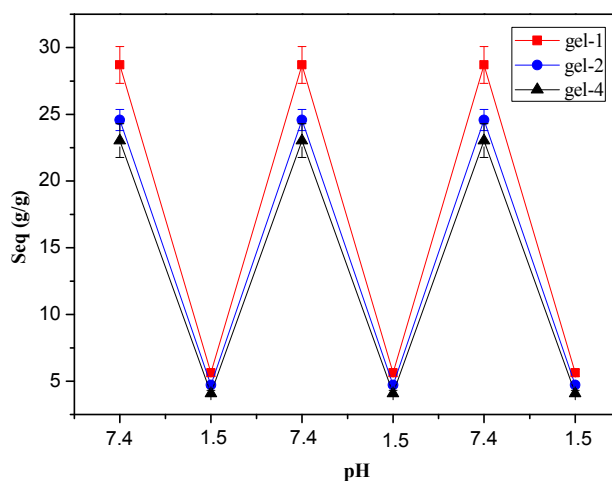

**Figure S1.** Reversible swelling-deswelling behaviors of gel-1, gel-2 and gel-4 in the buffer solutions of pH 1.5 and 7.4 at 37 °C.

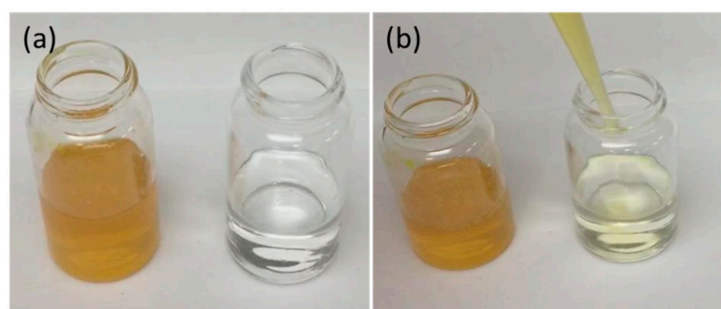

**Figure S2.** The color change in the acetylsalicylic acid solution released by gel-3 before (a) and after (b) the addition of FeCl<sub>3</sub>.

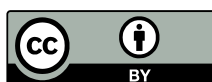

© 2017 by the authors. Submitted for possible open access publication under the terms and conditions of the Creative Commons Attribution (CC BY) license (<http://creativecommons.org/licenses/by/4.0/>).
